# Supplementary material for: Long-term antithrombotic therapy and risk of intracranial haemorrhage from cerebral cavernous malformations: a population-based cohort study, systematic review, and meta-analysis
Source: PubMed Central journal article supplement (PMC6744367; doi:10.1016/s1474-4422(19)30231-5), 2019-10
Supplement: mmc1.pdf [file mmc1.pdf]

### Supplementary appendix

This appendix formed part of the original submission and has been peer reviewed. We post it as supplied by the authors.

Supplement to: Zurbier SM, Hickman CR, Tolia CS, et al. Long-term antithrombotic therapy and risk of intracranial haemorrhage from cerebral cavernous malformations: a population-based cohort study, systematic review, and meta-analysis. *Lancet Neurol* 2019; published online Aug 7. [http://dx.doi.org/10.1016/S1474-4422\(19\)30231-5](http://dx.doi.org/10.1016/S1474-4422(19)30231-5).

1 **ONLINE APPENDIX**

2

3 Susanna M. Zuurbier, Charlotte R. Hickman, Christos S. Tolia, Leon A. Rinkel, Rebecca Leyrer,

4 Kelly D. Flemming, David Bervini, Giuseppe Lanzino, Robert J. Wityk, Hans-Martin Schneble,

5 Ulrich Sure, and Rustam Al-Shahi Salman for the Scottish Audit of Intracranial Vascular

6 Malformations Steering Committee and Collaborators. Association between long-term

7 antithrombotic therapy and risk of haemorrhage from cerebral cavernous malformations: a

8 population-based cohort study, systematic review, and meta-analysis.

9 **Literature search strategies**

10

11 **OVID Medline**

12 1. Hemangioma, Cavernous, Central Nervous System/

13 2. Hemangioma, Cavernous/

14 3. (cavernous (angioma or hemangioma or malformation))

15 4. cavernoma

16 5. 2 or 3 or 4

17 6. brain/ or central nervous system/ or exp cerebral arteries/

18 7. brain neoplasms/

19 8. (brain or cerebral or intracerebral or central nervous system or intracranial or cerebellar or  
20 intraventricular or supratentorial).tw.

21 9. 6 or 7 or 8

22 10. 5 and 9

23 11. 1 or 10

24 12. Anticoagulant.tw.

25 13. antithrombotic.tw.

26 14. antiplatelet.tw.

27 15. 12 or 13 or 14

28 16. 11 and 15

29

30 **OVID EMBASE**

31 1. Brain Hemangioma/

32 2. brain ventricle cavernoma/

33 3. cavernous hemangioma/

34 4. cavernous.tw.

- 35 5. cavernoma.tw.
- 36 6. 3 or 4 or 5
- 37 7. central nervous system/ or exp brain/ or exp brain ventricle/ or exp brain artery/
- 38 8. brain tumor/
- 39 9. (brain or cerebral or intracerebral or central nervous system or intracranial or cerebellar or  
40 intraventricular or supratentorial).tw.
- 41 10. 7 or 8 or 9
- 42 11. 6 and 10
- 43 12. 1 or 2 or 11
- 44 13. Anticoagulant agent/
- 45 14. antiplatelet.mp
- 46 15. 13 or 14
- 47 16. 12 and 15

48 **Cox Regression log minus log function to check proportional hazards assumption for the**  
49 **analysis of the primary outcome in the SAIVMs cohort study**  
50

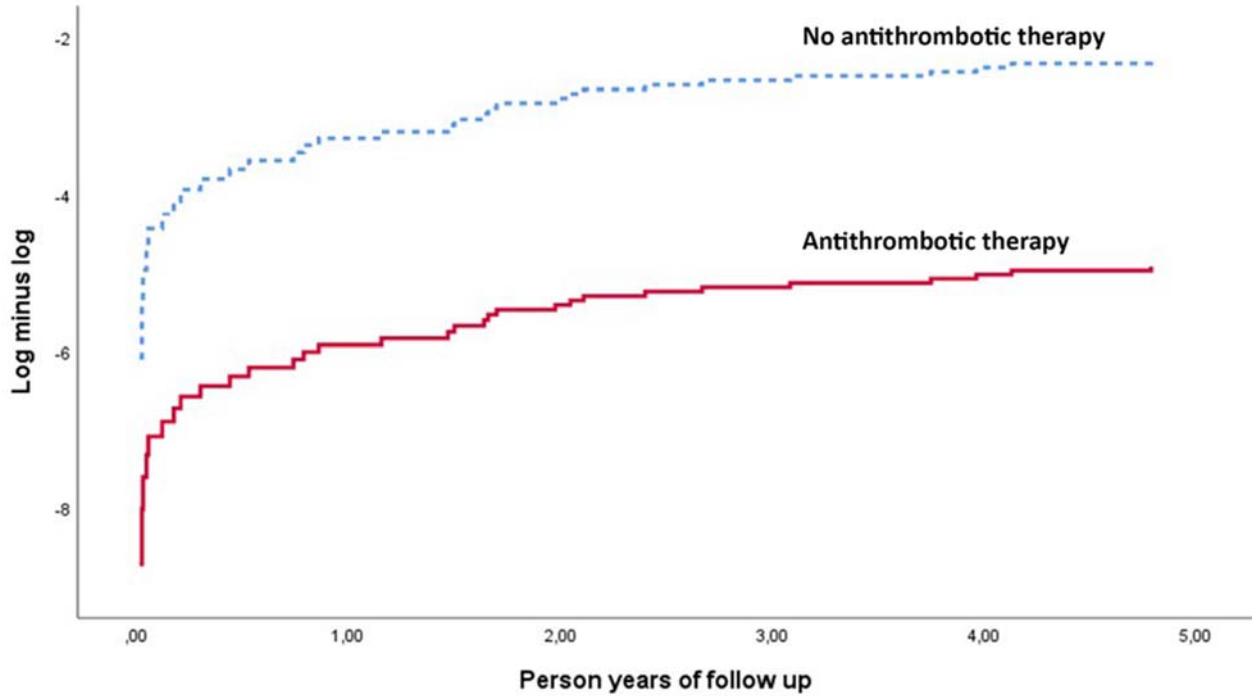

51

52 **Kaplan Meier plot of the risk of first intracranial haemorrhage or persistent/progressive focal**  
 53 **neurological deficit due to CCM according to antithrombotic therapy use, restricted to**  
 54 **patients with brainstem CCM, during 15 years of follow-up in the Scottish Audit of**  
 55 **Intracranial Vascular Malformations**

56

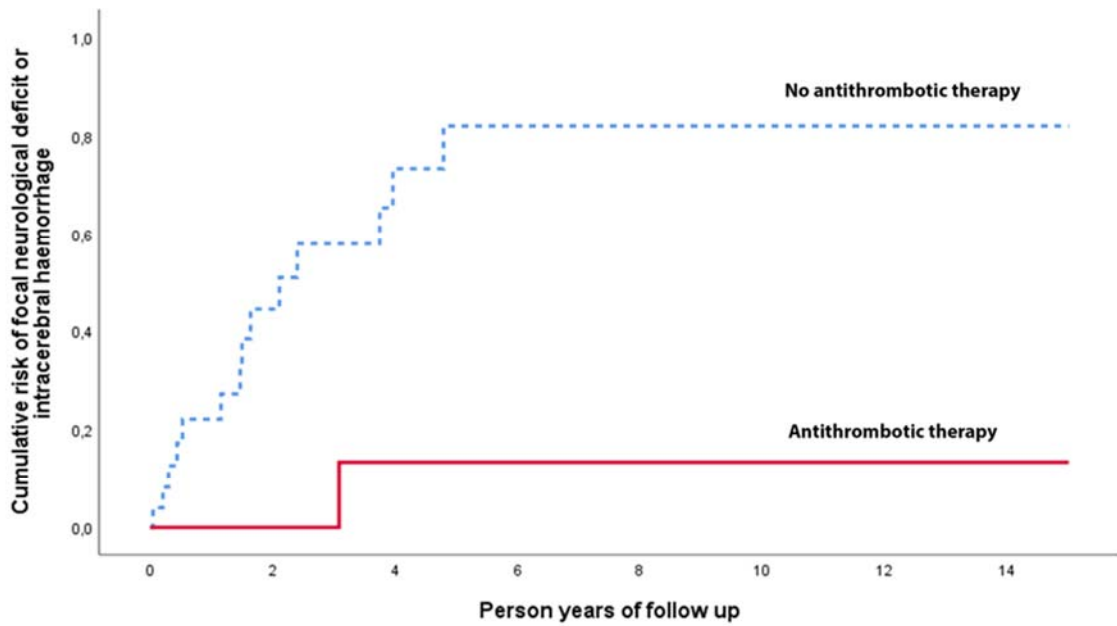

57

| Number at risk            |    |    |    |    |   |   |   |   |  |
|---------------------------|----|----|----|----|---|---|---|---|--|
| No antithrombotic therapy | 26 | 16 | 12 | 11 | 9 | 7 | 5 | 5 |  |
| Antithrombotic therapy    | 8  | 8  | 7  | 7  | 7 | 6 | 4 | 2 |  |

58 **Kaplan Meier plot of the risk of first intracranial haemorrhage or persistent/progressive focal**  
 59 **neurological deficit due to CCM according to antithrombotic therapy use, restricted to**  
 60 **patients presenting with intracranial haemorrhage, during 15 years of follow-up in the**  
 61 **Scottish Audit of Intracranial Vascular Malformations**

62

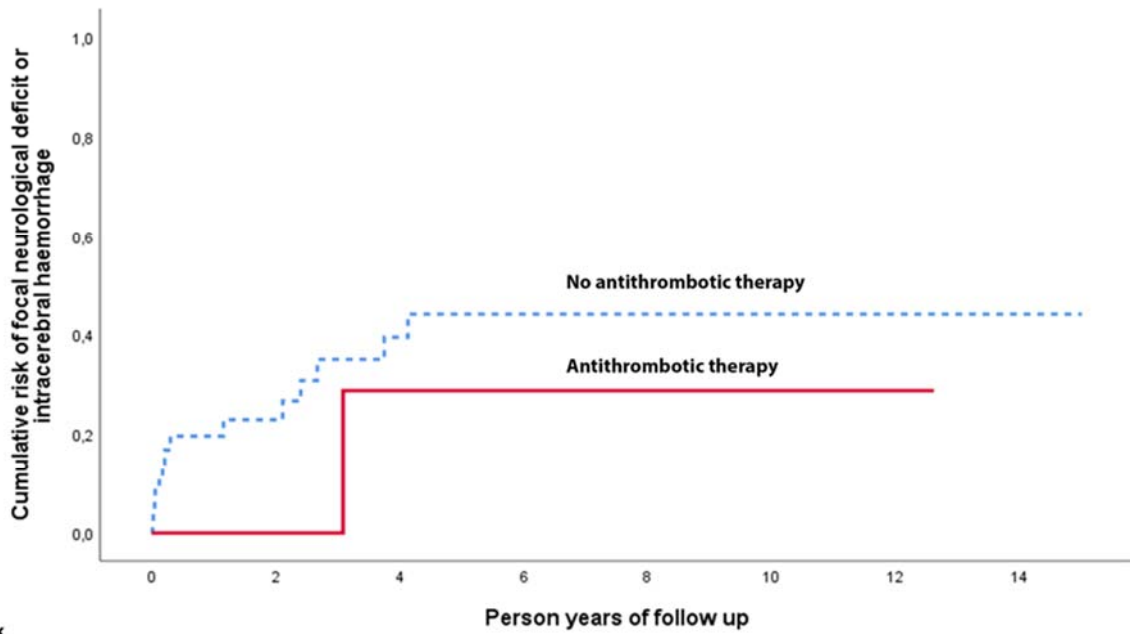

63

| Number at risk            |    | Person years of follow up |    |    |    |    |    |    |    |
|---------------------------|----|---------------------------|----|----|----|----|----|----|----|
|                           | 0  | 2                         | 4  | 6  | 8  | 10 | 12 | 14 | 15 |
| No antithrombotic therapy | 47 | 27                        | 22 | 20 | 20 | 10 | 7  | 5  |    |
| Antithrombotic therapy    | 5  | 5                         | 3  | 3  | 3  | 1  |    |    |    |

64 **Kaplan Meier plot of the risk of first intracranial haemorrhage or persistent/progressive focal**  
 65 **neurological deficit due to CCM according to antithrombotic therapy use, restricted to 29/61**  
 66 **patients starting antithrombotic therapy after first presentation, during 15 years of follow-up**  
 67 **in the Scottish Audit of Intracranial Vascular Malformations**

68

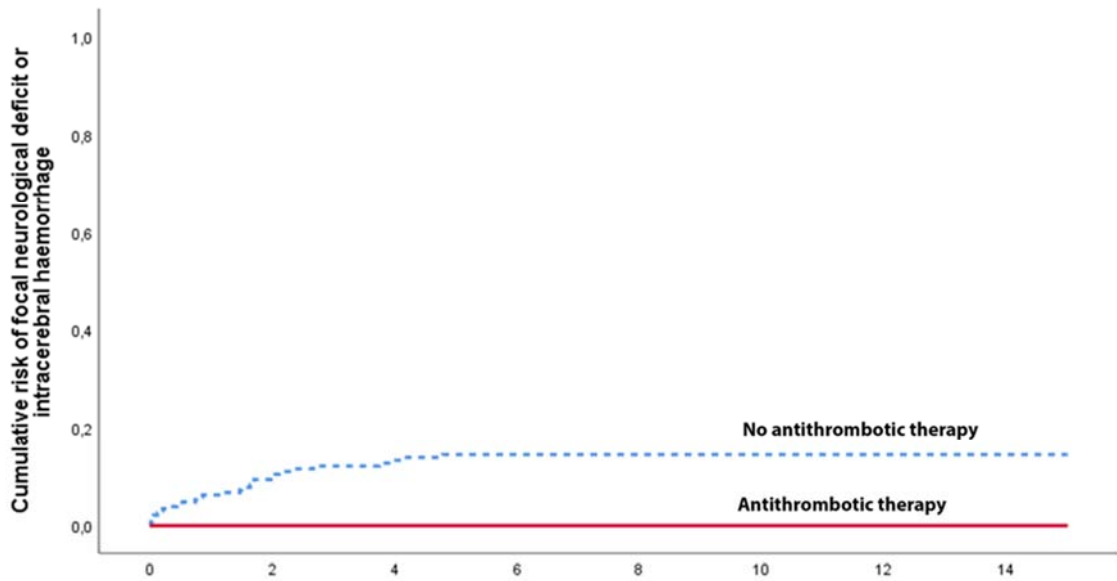

| Number at risk            |     | Person years of follow up |     |     |     |     |    |    |  |
|---------------------------|-----|---------------------------|-----|-----|-----|-----|----|----|--|
|                           | 0   | 2                         | 4   | 6   | 8   | 10  | 12 | 14 |  |
| No antithrombotic therapy | 239 | 186                       | 171 | 163 | 151 | 112 | 81 | 63 |  |
| Antithrombotic therapy    | 29  | 29                        | 29  | 28  | 27  | 24  | 19 | 15 |  |

69



70 **Kaplan Meier plot of the risk of first intracranial haemorrhage or persistent/progressive focal**  
 71 **neurological deficit due to CCM, as well as death or first CCM treatment (to explore these as**  
 72 **competing risks), during 15 years of follow-up in the Scottish Audit of Intracranial Vascular**  
 73 **Malformations**  
 74

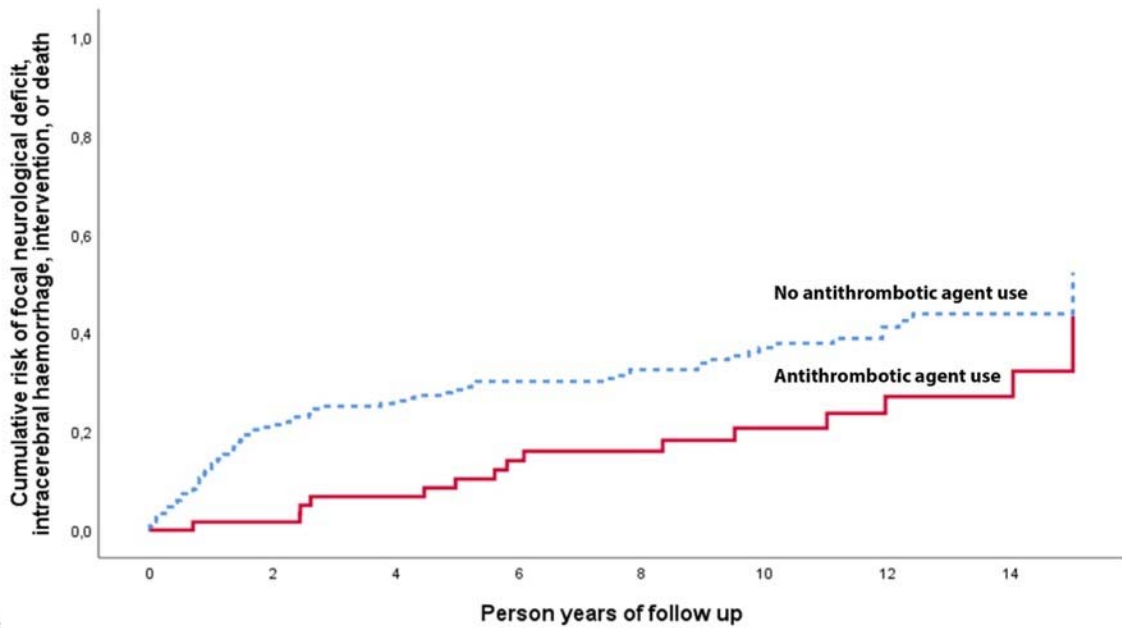

| Number at risk              |     | Person years of follow up |     |     |     |     |    |    |  |
|-----------------------------|-----|---------------------------|-----|-----|-----|-----|----|----|--|
| No antithrombotic agent use | 239 | 194                       | 182 | 174 | 161 | 118 | 84 | 65 |  |
| Antithrombotic agent use    | 61  | 60                        | 57  | 53  | 49  | 40  | 29 | 20 |  |

75

76 **Kaplan Meier plot of the risk of first intracranial haemorrhage due to CCM according to**  
 77 **antithrombotic therapy use during 15 years of follow-up in the Scottish Audit of Intracranial**  
 78 **Vascular Malformations**  
 79

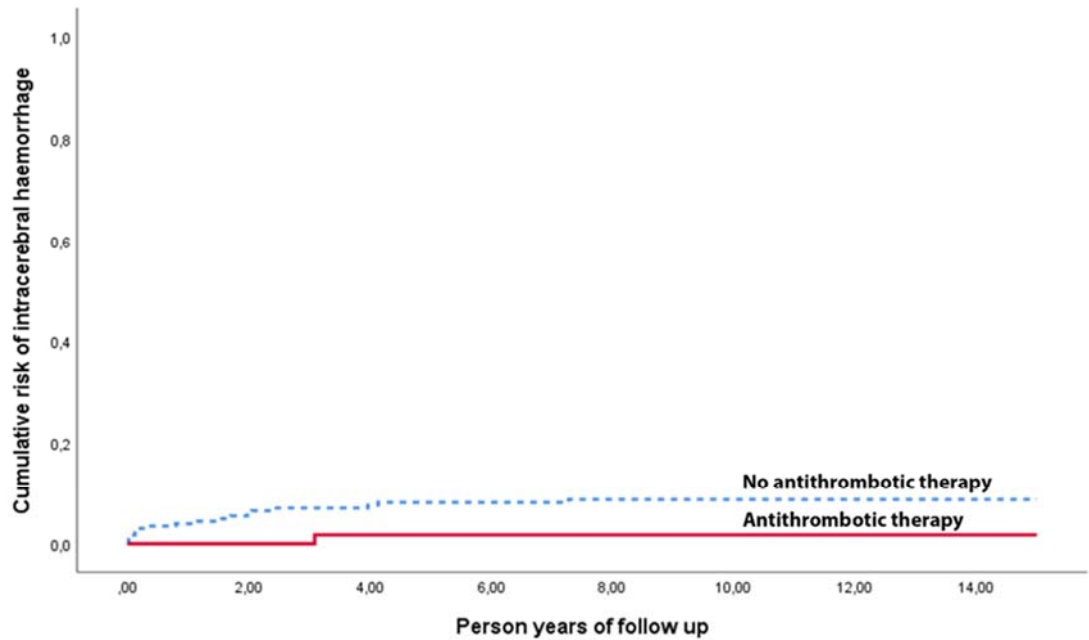

| Number at risk            |     | Person years of follow up |     |     |     |     |    |    |    |
|---------------------------|-----|---------------------------|-----|-----|-----|-----|----|----|----|
|                           |     | 0                         | 2   | 4   | 6   | 8   | 10 | 12 | 14 |
| No antithrombotic therapy | 238 | 192                       | 180 | 173 | 160 | 120 | 88 | 70 |    |
| Antithrombotic therapy    | 62  | 61                        | 57  | 53  | 49  | 40  | 30 | 21 |    |

80

81 **Characteristics of studies included in the meta-analysis**

82

| <b>Study characteristics</b>                                           | <b>Bervini</b> | <b>Flemming</b> | <b>Schneble</b>               | <b>Wityk</b>   | <b>Lanzino</b> | <b>Al-Shahi Salman</b> |
|------------------------------------------------------------------------|----------------|-----------------|-------------------------------|----------------|----------------|------------------------|
| <b>Study design</b>                                                    | Hospital based | Hospital based  | Hospital based                | Hospital based | Hospital based | Population based       |
| <b>Period of inclusion</b>                                             | 1980-2015      | 1989-1999       | 2008-2010                     | 1987-2009      | 2015-2019      | 1999-2003 or 2006-2010 |
| <b>Identification of patients</b>                                      | Prospective    | Retrospective   | Prospective                   | Retrospective  | Prospective    | Prospective            |
| <b>Follow-up of patients</b>                                           | Retrospective  | Retrospective   | Prospective and retrospective | Retrospective  | Prospective    | Prospective            |
| <b>Random sequence generation</b>                                      | No             | No              | No                            | No             | No             | No                     |
| <b>Allocation concealment</b>                                          | No             | No              | No                            | No             | No             | No                     |
| <b>Participants and personnel masked to antithrombotic therapy use</b> | No             | No              | No                            | No             | No             | No                     |
| <b>Outcome assessment masked to antithrombotic therapy use</b>         | No             | No              | No                            | No             | Yes            | Yes                    |

83

84 **Post hoc meta-analyses of the association between antiplatelet therapy or anticoagulant**  
 85 **therapy use and the risk of intracranial haemorrhage from CCM in cohort studies**

86

87 *Post hoc meta-analysis of antiplatelet therapy alone (n=207) versus no antithrombotic therapy*

88 *(n=1,089):*

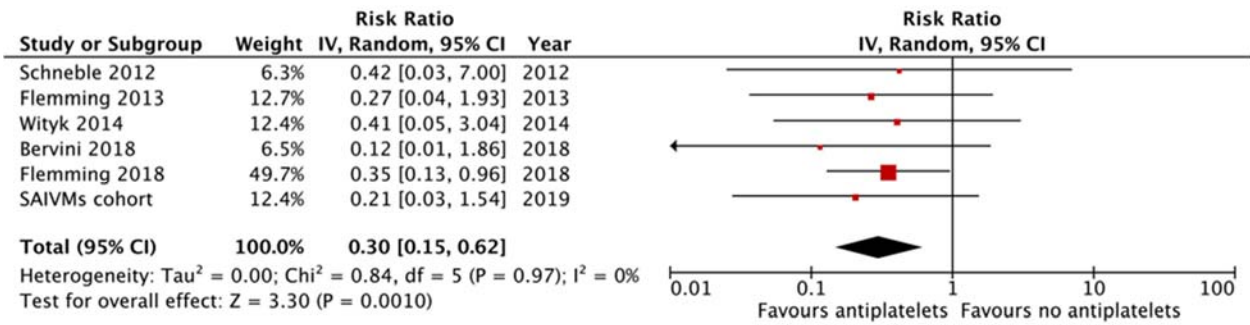

89

90 *Post hoc meta-analysis of anticoagulant therapy (n=46) versus no antithrombotic therapy*

91 *(n=1,089):*

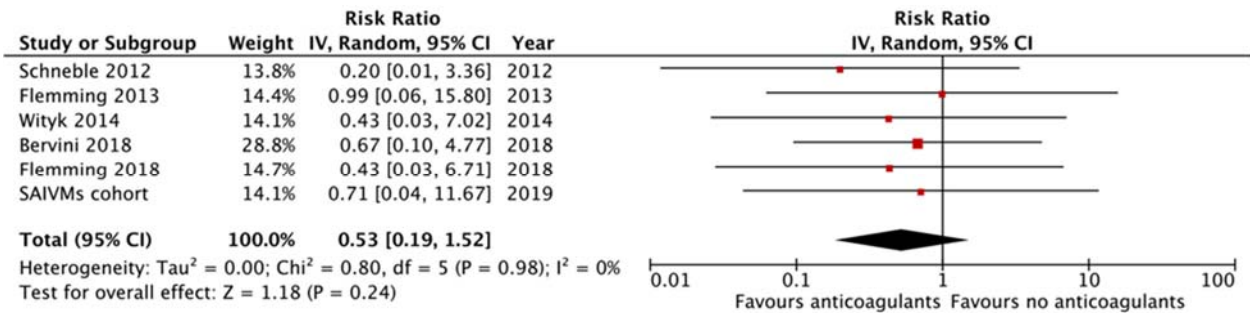

92

93
